# Supplementary material for: CTLA-4 Mediates Inhibitory Function of Mesenchymal Stem/Stromal Cells
Source: PubMed Central journal article supplement (PMC6121442; doi:10.3390/ijms19082312), 2018-08-07
Supplement: ijms-19-02312-s001.pdf [file ijms-19-02312-s001.pdf]

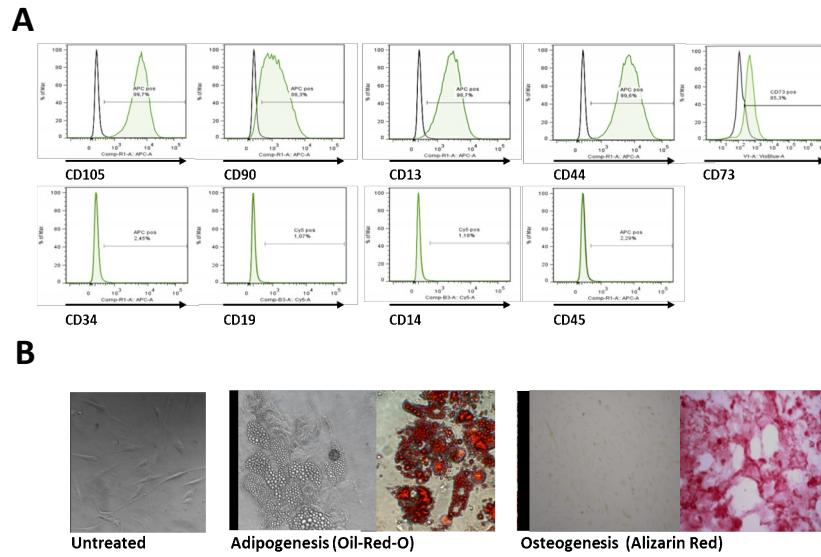

**Supplemental Figure 1.** Human bone marrow-derived MSCs are characterized by specific markers and differentiation capacity. The plastic adherent MSCs are characterized (A) by the expression of surface marker CD13, CD44, CD73, CD90 and CD105, but the lack of CD14, CD19, CD34 expression and CD45 and (B) by their differentiation capacity towards adipogenesis and osteogenesis as demonstrated by Oil-Red-O staining and Alizarin Red staining, respectively.
